# Supplementary material for: Non-Coding RNA in Salivary Extracellular Vesicles: A New Frontier in Sjögren’s Syndrome Diagnostics?
Source: MDPI journal article supplement (doi:10.3390/ijms241713409), 2023-08-29
Supplement: s1 [file s1]

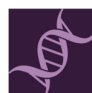

Article

# Non-Coding RNA in Salivary Extracellular Vesicles: A New Frontier in Sjögren's Syndrome Diagnostics?

## Supplementary Materials

**Table S1.** Clinical data of pSS study participants.

| ID Number | Age <sup>1</sup> (Years) | Anti-SSA <sup>2</sup> | Anti-SSB <sup>2</sup> | Dry Mouth <sup>3</sup> | Dry Eyes <sup>4</sup> | Saliva Secretion <sup>5</sup> | Schirmer Test <sup>6</sup> |
|-----------|--------------------------|-----------------------|-----------------------|------------------------|-----------------------|-------------------------------|----------------------------|
| PSS1      | 55                       | +                     | +                     | +                      | +                     | +                             | +                          |
| PSS2      | 64                       | +                     | +                     | +                      | +                     | +                             | +                          |
| PSS3      | 72                       | +                     | +                     | +                      | +                     | +                             | *                          |
| PSS4      | 47                       | +                     | +                     | +                      | +                     | +                             | +                          |
| PSS5      | 68                       | +                     |                       | +                      | +                     | +                             | +                          |
| PSS6      | 48                       | +                     | +                     | +                      | +                     | +                             | +                          |
| PSS7      | 44                       | +                     | +                     | +                      | +                     | +                             | +                          |
| PSS8      | 57                       | +                     | +                     | +                      | +                     | +                             |                            |
| PSS9      | 71                       | +                     |                       | +                      | +                     | +                             | +                          |
| PSS10     | 48                       | +                     | +                     | +                      | +                     | +                             | +                          |
| PSS11     | 39                       | +                     |                       | +                      | +                     | +                             | +                          |

<sup>1</sup> Age = age at biopsy

<sup>2</sup> Serum autoantibodies, + indicates positivity

<sup>3</sup> Patient-reported symptoms of dry mouth, + indicates dryness

<sup>4</sup> Patient-reported symptoms of dry eyes, + indicates dryness.

<sup>5</sup> Unstimulated salivary secretion, normal salivary flow > 1.5ml/15min, + indicates ≤ 1.5ml/15min

<sup>6</sup> Tear secretion, normal tear flow > 5mm/5min, + indicates ≤ 5mm/5min

\* The patient did not tolerate the Schirmer test

pSS: Primary Sjögren's Syndrome

Anti-SSA: anti- Sjögren's Syndrome-related antigen A autoantibodies

Anti-SSB: anti- Sjögren's Syndrome-related antigen B autoantibodies.
